# Supplementary material for: Application Potential of CTHRC1 as a Diagnostic and Prognostic Indicator for Colon Adenocarcinoma
Source: Front Mol Biosci. 2022 Mar 1;9:849771. doi: 10.3389/fmolb.2022.849771 (PMC8921526; doi:10.3389/fmolb.2022.849771)
Supplement: Supplementary file 1 [file Table1.XLSX]

## Sheet: Sheet1
	Description	Gene markers	Cor	p-value
	CD8+ T cell	CD8A	0.235	1.75e-06
		CD8B	0.151	0.00224
	T cell (general)	CD3D	0.148	0.00276
		CD3E	0.235	1.71e-06
		CD2	0.271	2.9e-08
	B cell	CD19	0.063	0.205
		CD79A	0.14	0.00475
	Monocyte	CD86	0.402	3.1e-17
		CD115(CSF1R)	0.51	2.64e-28
	TAM	CCL2	0.656	3.03e-51
		CD68	0.639	6.6e-48
		IL10	0.475	3.38e-24
	M1 Macrophage	iNOS(NOS2)	-0.203	1.25e-05
		IRF5	0.309	1.37e-11
		COX2(PTGS2)	0.29	2.56e-10
	M2 Macrophage	CD163	0.627	1.97e-63
		VSIG4	0.601	3.41e-41
		MS4A4A	0.663	2.72e-59
	Neutrophils	CD66b( CEACAM8)	-0.186	6.07e-05
		CD11b( ITGAM)	0.67	4.31e-61
		CCR7	0.311	9.52e-12
	Natural killer cell	KIR2DL1	0.197	2.25e-05
		KIR2DL3	0.16	0.000571
		KIR2DL4	0.19	4.1e-05
		KIR3DL1	0.226	1.04e-06
		KIR3DL2	0.207	7.94e-06
		KIR3DL3	0.053	0.258
		KIR2DS4	0.168	0.000296
	Dendritic cell	HLA-DPB1	0.505	5.98e-31
		HLA-DQB1	0.329	4.95e-13
		HLA-DRA	0.505	2.73e-31
		HLA-DPA1	0.513	3.63e-32
		BDCA-1(CD1c)	0.258	1.42e-07
		BDCA-4(NRP1)	0.704	6.65e-62
		CD11c(ITGAX)	0.607	2.73e-42
	Th1	T-bet(TBX21)	0.279	1.11e-08
		STAT4	0.255	1.83e-07
		STAT1	0.382	1.48e-15
		IFN-γ(IFNG)	0.182	0.000221
		TNF-α(TNF)	0.278	1.2e-08
	Th2	GATA3	0.329	1.06e-11
		STAT6	-0.063	0.206
		STAT5A	0.184	0.000188
		IL13	0.224	5.04e-06
	Tfh	BCL6	0.448	1.84e-21
		IL21	0.182	0.00022
	Th17	STAT3	0.24	1.05e-06
		IL17A	-0.276	1.49e-08
	Treg	FOXP3	0.403	2.81e-17
		CCR8	0.461	1.05e-22
		STAT5B	0.24	9.95e-07
		TGFβ(TGFB1)	0.59	1.98e-39
	T cell exhaustion	PD-1(PDCD1)	0.224	5.32e-06
		CTLA4	0.341	1.64e-12
		LAG3	0.226	4.13e-06
		TIM-3(HAVCR2)	0.665	3.28e-53
		GZMB	0.049	0.327
		TOX	0.074	0.136
		TIGIT	0.369	1.64e-14
		Bold values indicate P < 0.05.
